# Supplementary material for: Postponed healthcare in The Netherlands during the COVID-19 pandemic and its impact on self-reported health
Source: Frontiers journal article supplement (doi:10.3389/frhs.2023.1181532), 2023-06-23
Supplement: Data_Sheet_1.pdf [file Data_Sheet_1.pdf]

# Postponed medical care during the COVID-19 pandemic

**Questionnaire administered to the LISS panel**

A decorative graphic on the left side of the page consisting of several blue dots of varying sizes and two thick blue curved lines, one near the top and one near the bottom, arranged in a circular pattern.

**Date** December 2022  
**Version** 1.0  
**Classification** Standard

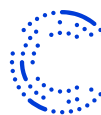

© Centerdata, Tilburg 2022

All rights reserved. No part of this publication may be reproduced, stored in a retrieval system, or transmitted, in any form or by any means, electronic, mechanical, photocopying, recording or otherwise, without the prior written permission of the publisher.

---

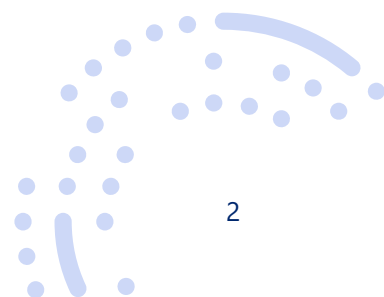

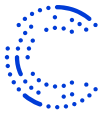

# Table of contents

|   |                     |   |
|---|---------------------|---|
| 1 | Project description | 4 |
| 2 | Introduction        | 5 |
| 3 | Codebook            | 6 |

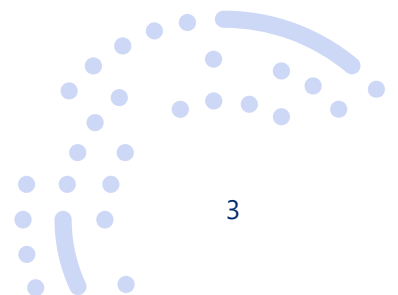

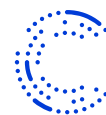

# 1 Project description

**Title:** Postponed medical care during the COVID-19 pandemic

**Data file:** vx22a

**Funding source(s):** ODISSEI; OCW (Domeinplan SSH); RIVM

**Researcher(s):** Kirsten Visscher (RIVM)

**Project description:** The aim of this study is to gather information about the number of people that had to deal with postponed medical care, the types of healthcare that were postponed, and whether this had consequences for one's health.

**Sample:** Participants of the most recent Health Core Study (November 2021). To make sure the net sample would be representative for the variables age, education and province, we oversampled younger panel members as they respond the least.

**Overview of the response:**

|                                       |       |          |
|---------------------------------------|-------|----------|
| Selected number of household members: | 2,540 | (100.0%) |
| Non-response:                         | 497   | (19.6%)  |
| Response:                             | 2,043 | (80.4%)  |
| Complete:                             | 2,039 | (80.3%)  |
| Incomplete:                           | 4     | (0.2%)   |

**Date of data collection:** August 2022

**Titel:** Uitgestelde zorg tijdens de coronapandemie

**Databestand:** vx22a

**Financiering:** ODISSEI; OCW (Domeinplan SSH); RIVM

**Onderzoeker(s):** Kirsten Visscher (RIVM)

**Projectbeschrijving:** Het doel van deze studie is informatie te verzamelen over de mate waarin men te maken kreeg met uitgestelde zorg, welke vorm van zorg is uitgesteld en of dit gevolgen had voor de gezondheid.

**Steekproef:** Deelnemers aan de meest recente afname van de Health Core Study (november 2021). Om ervoor te zorgen dat de netto steekproef representatief is op de verdeling naar leeftijd, opleiding en provincie, hebben we als uitgangspunt de jongere panelleden oververtegenwoordigd omdat deze groep het minst goed respondeert.

**Responsoverzicht:**

|                                   |       |          |
|-----------------------------------|-------|----------|
| Selectie aantal leden huishouden: | 2.540 | (100,0%) |
| Nonrespons:                       | 497   | (19,6%)  |
| Respons:                          | 2.043 | (80,4%)  |
| Compleet:                         | 2.039 | (80,3%)  |
| Incompleet:                       | 4     | (0,2%)   |

**Datum van dataverzameling:** augustus 2022

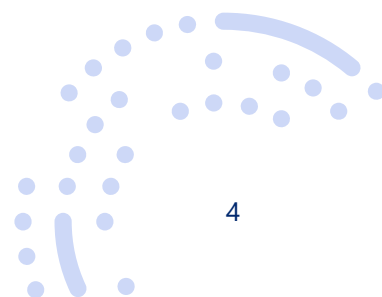



## 2 Introduction

In August 2022, the questionnaire “Uitgestelde zorg” (Postponed medical care) was fielded in the LISS panel<sup>1</sup>.

The questionnaire was presented to 2,540 panel members and 2,039 respondents fully completed the survey (response percentage 80.3%).

<sup>1</sup> Reference to LISS panel data in text:

*In this paper we make use of data of the LISS (Longitudinal Internet studies for the Social Sciences) panel administered by Centerdata (Tilburg University, The Netherlands).*

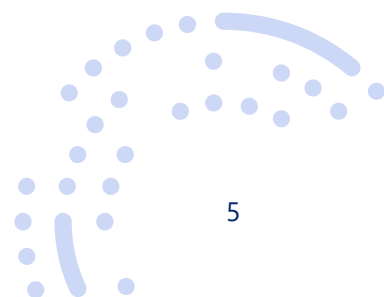



### 3 Codebook

This codebook contains the questionnaire as administered to the LISS panel.

- Variable names: The variable names are printed in bold and correspond to the names in the dataset.
- The questionnaire routing is printed in bold and colored blue for each variable concerned.
  - = means "is equal to"
  - != means "is not equal to"
  - <= means "smaller or equal to"
  - >= means "larger or equal to"
- If there were buttons on a page for "I don't know, "I refuse to say" or "Not applicable", this will be indicated at the top at "Page" (when the button is clicked, the corresponding value is written to all variables that were present on the page)
- text: answer box (no limit to the length of the answer).
- string: answer box allowing a certain number of characters (standard is 255).
- empty: questions could be left unanswered
- Numerical variables: If ranges were used, these are printed in italics in the codebook if the respondent could not see them on the screen. If the respondent was able to see the ranges, the variables are printed in normal letter. Integer: If a question is not subject to any limit (integer), no range is indicated.
- 'Fills' (variable text) are given between straight brackets [].
- Variables in between curly brackets {} are not part of the dataset, but the corresponding questions or text were part of the questionnaire.

#### **nomem\_encr<sup>2</sup>**

Number of the household member encrypted  
*integer*

#### **vx22a\_m**

Year and month of the field work period  
*integer*

<sup>2</sup> Use nomem\_encr as key variable for merging with other LISS panel studies from the LISS Panel Data Archive: <https://www.dataarchive.lissdata.nl>

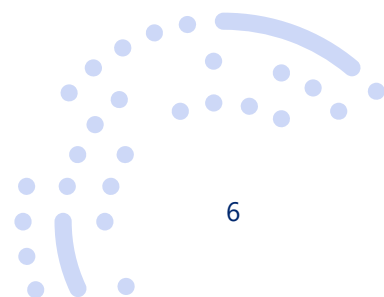



Questions vx22a034 - vx22a047 and vx22a048 - vx22a061 concern the healthcare providers with whom an appointment was postponed or cancelled (vx22a026 - vx22a032). If more than two healthcare providers were chosen under vx22a026 - vx22a032, these questions concerned a random two of those healthcare providers (healthcare providers from categories other than "a different healthcare provider" were given priority). The random choice was based on variables vx22a001 - vx22a006. For example, if a respondent chose option 5 (home care) in questions vx22a026 - vx22a032 and vx22a001 = 5, then vx22a021 is "home care". For the second healthcare provider, the subsequent permutation variables were used.

#### **vx22a001 - vx22a006**

Permutation variables for choices vx22a021 and vx22a022

1. vx22a021/vx22a022=GP or GP's practice nurse
2. vx22a021/vx22a022=dentist or dental hygienist
3. vx22a021/vx22a022=physiotherapist, dietician or remedial therapist
4. vx22a021/vx22a022=hospital specialist
5. vx22a021/vx22a022=domiciliary carer
6. vx22a021/vx22a022=psychologist or psychiatrist

Questions vx22a071 - vx22a095 and vx22a096 - vx22a120 concern the healthcare providers with whom an appointment was postponed or cancelled by the respondent themselves (vx22a063 - vx22a069). If more than two healthcare providers were chosen under vx22a063 - vx22a069, these questions concerned a random two of those healthcare providers (healthcare providers from categories other than "a different healthcare provider" were given priority). The random choice was based on variables vx22a007 - vx22a012.

#### **vx22a007 - vx22a012**

Permutation variables for choices vx22a023 and vx22a024

1. vx22a023/vx22a024=GP or GP's practice nurse
2. vx22a023/vx22a024=dentist or dental hygienist
3. vx22a023/vx22a024=physiotherapist, dietician or remedial therapist
4. vx22a023/vx22a024=hospital specialist
5. vx22a023/vx22a024=domiciliary carer
6. vx22a023/vx22a024=psychologist or psychiatrist

#### **vx22a013**

Auxiliary variable: must vx22a034 - vx22a039 be asked?

0. No
1. Yes

#### **vx22a014**

Auxiliary variable: must vx22a048 - vx22a053 be asked?

0. No
1. Yes

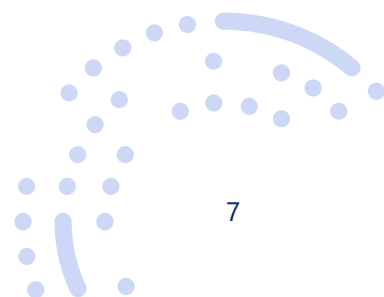

**vx22a015**

Auxiliary variable: must vx22a071 - vx22a076 be asked?

- 0. No
- 1. Yes

**vx22a016**

Auxiliary variable: must vx22a096 - vx22a101 be asked?

- 0. No
- 1. Yes

**vx22a017**

Auxiliary variable: must vx22a040 be asked?

- 0. Not a dentist: ask vx22a040
- 1. Dentist: do not ask vx22a040

**vx22a018**

Auxiliary variable: must vx22a054 be asked?

- 0. Not a dentist: ask vx22a054
- 1. Dentist: do not ask vx22a054

**vx22a019**

Auxiliary variable: must vx22a077 be asked?

- 0. Not a dentist: ask vx22a077
- 1. Dentist: do not ask vx22a077

**vx22a020**

Auxiliary variable: must vx22a102 be asked?

- 0. Not a dentist: ask vx22a102
- 1. Dentist: do not ask vx22a102

**vx22a021**

Healthcare provider follow-up questions round one – postponed by healthcare provider

- 1. GP or GP's practice nurse
- 2. dentist or dental hygienist
- 3. physiotherapist, dietician or remedial therapist
- 4. hospital specialist
- 5. domiciliary carer
- 6. psychologist or psychiatrist
- 7. other healthcare provider (vx22a033)

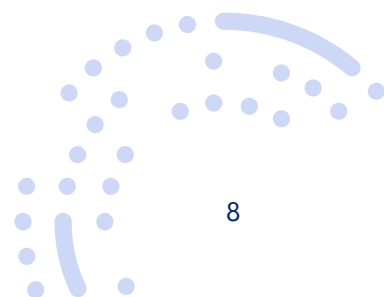



**vx22a022**

Healthcare provider follow-up questions round two – postponed by healthcare provider

1. GP or GP's practice nurse
2. dentist or dental hygienist
3. physiotherapist, dietician or remedial therapist
4. hospital specialist
5. domiciliary carer
6. psychologist or psychiatrist
7. other healthcare provider (vx22a033)

**vx22a023**

Healthcare provider follow-up questions round one – postponed by respondent

1. GP or GP's practice nurse
2. dentist or dental hygienist
3. physiotherapist, dietician or remedial therapist
4. hospital specialist
5. domiciliary carer
6. psychologist or psychiatrist
7. other healthcare provider (vx22a070)

**vx22a024**

Healthcare provider follow-up questions round two – postponed by respondent

1. GP or GP's practice nurse
2. dentist or dental hygienist
3. physiotherapist, dietician or remedial therapist
4. hospital specialist
5. domiciliary carer
6. psychologist or psychiatrist
7. other healthcare provider (vx22a070)

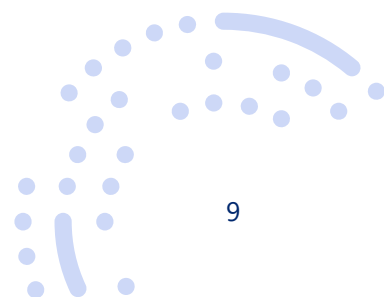



---

Page 1

**all respondents**

**{intro}**

**Reason for this study**

This study is conducted on behalf of RIVM (the Dutch National Institute of Public Health and Environmental Protection) and concerns postponed medical care during the COVID-19 pandemic. RIVM wishes to know more about, for example, which forms of healthcare that you required were postponed, why these postponements occurred, and whether these postponements had any consequences for your health.

The researchers want to learn from the experiences of people during the pandemic so that they can take these into account in the event of future outbreaks of diseases.

Answer type: None

---

Page 2

**all respondents**

**{intro2}**

**What is postponed care?**

By “postponed care” we mean all healthcare that took place at a later date than usual as a result of the COVID-19 pandemic. This includes appointments with GPs, dentists, physiotherapists, specialists, domiciliary carers, psychologists and hospital treatments, for example.

It also covers both appointments that you personally postponed, appointments that you chose not to make at all, and appointments that were postponed or cancelled by the healthcare provider in question.

Below are a few examples.

Because of the COVID-19 pandemic:

- an appointment with a specialist at an outpatient clinic was postponed;
- you refrained from making an appointment with your GP;
- you wanted to schedule an appointment with your GP, but it was not possible to do so;
- you postponed an appointment with your dentist or dental hygienist;
- an appointment for surgery or day treatment was cancelled;
- an appointment with your physiotherapist, psychologist or for care in a private clinic was cancelled or postponed;
- an appointment with your domiciliary carer was cancelled or postponed;
- appointments with other healthcare providers were cancelled.

Answer type: None

---

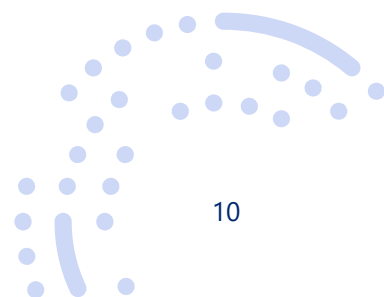



---

Page 3

**all respondents**

**{intro\_zorgverlener}**

The following questions concern appointments that were postponed or cancelled **by the healthcare provider**. Questions about appointments that were cancelled by you will be asked later on in this questionnaire.

Answer type: None

---

Page 4

**all respondents**

**vx22a025**

When we talk about "the COVID-19 period", we mean the period from the start of the COVID-19 crisis in March 2020 up to now.

During the COVID-19 period, have one or more of your scheduled medical appointments or treatments been postponed or cancelled **by the healthcare provider?**

Answer type: Radio buttons

Categories:

1. Yes
  2. No
  3. Not applicable, I did not have any scheduled appointments
- 

Page 5

**if (vx22a025 = 1)**

**vx22a026 - vx22a032**

Which healthcare provider postponed or cancelled an appointment or treatment?

*Multiple answers possible.*

Answer type: Checkboxes

Categories:

- vx22a026** my GP or my GP's practice nurse
- vx22a027** my dentist or dental hygienist
- vx22a028** my physiotherapist, dietician or remedial therapist
- vx22a029** a hospital specialist
- vx22a030** a domiciliary carer
- vx22a031** my psychologist or psychiatrist

---

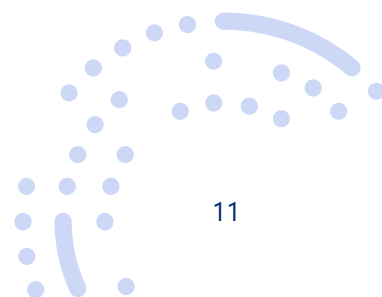



**vx22a032** a different healthcare provider, namely:

- 0. No
- 1. Yes

**vx22a033**

*Question type:* Inline text field attached to code 1 of question "vx22a032"

*Answer type:* String

---

Page 6

**if (vx22a013 = 1)**

**vx22a034 - vx22a039**

You indicated that an appointment or treatment with a **hospital specialist** was postponed or cancelled.

What kind of appointment was it?

*Multiple answers possible.*

*Answer type:* Checkboxes

*Categories:*

**vx22a034** Surgery

**vx22a035** Day treatment

**vx22a036** Diagnosis

**vx22a037** Checkup at outpatient clinic

**vx22a038** Other appointment at outpatient clinic

**vx22a039** I don't know

- 0. No
- 1. Yes

---

Page 7

**if (vx22a017 = 0)**

**vx22a040**

You indicated that an appointment with a **[vx22a021]** was postponed or cancelled.

Did this concern postponed care for a chronic disease?

*A chronic disease is a condition that will never completely go away, such as arthritis, asthma, COPD, diabetes and cardiovascular disease.*

*Answer type:* Radio buttons

*Categories:*

- 1. Yes

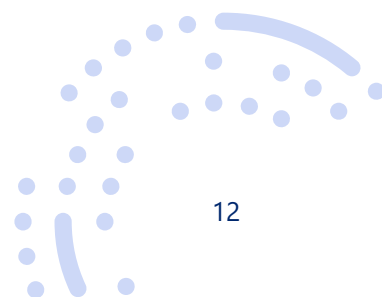



2. No

---

Page 8

**if (vx22a025 = 1)**

**vx22a041**

How often was an appointment with a **[vx22a021]** postponed or cancelled during the COVID-19 period?

Answer type: Radio buttons

Categories:

1. 1 time
2. 2 times
3. 3 times or more

---

Page 9

**if (vx22a025 = 1)**

**vx22a042 – vx22a043**

You indicated that an appointment with a **[vx22a021]** was postponed or cancelled.

When did this happen, approximately?

*If you do not know, you can provide an estimate. If it happened several times, base your answer on the appointment for which the postponement/cancellation was the most inconvenient for you.*

Question type: Mixed table

Sub-questions:

**vx22a042**

Answer type: Dropdown

Label-left: Month:

Categories:

1. January
2. February
3. March
4. April
5. May
6. June
7. July
8. August
9. September
10. October

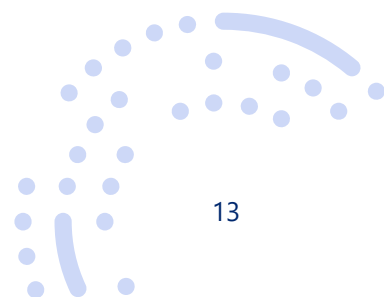

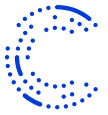

11. November

12. December

**vx22a043**

Answer type: Dropdown

Label-left: Year:

Categories:

2020. 2020

2021. 2021

2022. 2022

---

Page 10

**if (vx22a025 = 1)**

**vx22a044**

You indicated that an appointment with a **[vx22a021]** was postponed or cancelled.

Did the postponement of that appointment have consequences for your health?

*E.g. complaints, increased complaints, stress.*

Answer type: Radio buttons

Categories:

1. Yes, a lot

2. Yes, a bit

3. No

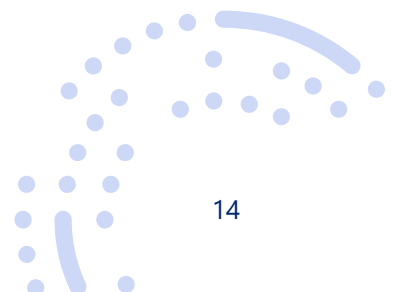



---

Page 11

**if (vx22a044 < 3)**

**vx22a045**

You indicated that an appointment with a [vx22a021] was postponed or cancelled.

What grade would you give your health at the time when you experienced the greatest number of negative consequences of the postponement of the appointment?

Answer type: Radio buttons

Layout: horizontal

Categories:

1. 1 Very poor
2. 2
3. 3
4. 4
5. 5
6. 6
7. 7
8. 8
9. 9
10. 10 Perfect

---

Page 12

**if (vx22a044 < 3)**

**vx22a046**

You indicated that an appointment with a [vx22a021] was postponed or cancelled.

Are you still experiencing negative consequences as a result of the postponement of that appointment?

*E.g. complaints, increased complaints, stress.*

Answer type: Radio buttons

Categories:

1. Yes, a lot
2. Yes, a bit
3. No

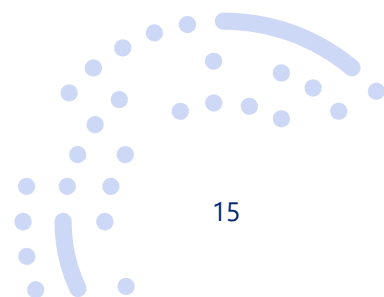



---

Page 13

**if (vx22a025 = 1)**

**vx22a047**

You indicated that an appointment with a **[vx22a021]** was postponed or cancelled.

What happened with regard to the appointment?

*Answer type:* Radio buttons

*Categories:*

1. It took place at a later date, as originally intended
2. The appointment took place at a later date, but with a different care provider or organization
3. The appointment took place in a different form, e.g. by telephone or video call
4. A new appointment was scheduled, but that appointment has not yet taken place
5. No new appointment has been made (yet)
6. Because my health was deteriorating, I had to make use of emergency care
7. The appointment is no longer necessary

---

Page 14

**if (vx22a014 = 1)**

**vx22a048 - vx22a053**

You indicated that an appointment or treatment with **a hospital specialist** was postponed or cancelled.

What kind of appointment was it?

*Multiple answers possible.*

*Answer type:* Checkboxes

*Categories:*

- vx22a048** Surgery
  - vx22a049** Day treatment
  - vx22a050** Diagnosis
  - vx22a051** Checkup at outpatient clinic
  - vx22a052** Other appointment at outpatient clinic
  - vx22a053** I don't know
0. No
  1. Yes

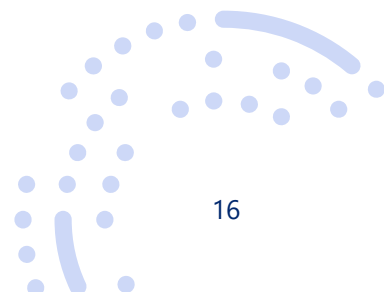





---

Page 15

**if (vx22a018 = 0)**

**vx22a054**

You indicated that an appointment with a [vx22a022] was postponed or cancelled.

Did this concern postponed care for a chronic disease?

*A chronic disease is a condition that will never completely go away, such as arthritis, asthma, COPD, diabetes and cardiovascular disease.*

Answer type: Radio buttons

Categories:

1. Yes
2. No

---

Page 16

**if (count(vx22a026 - vx22a032) > 1)**

**vx22a055**

How often was an appointment with a [vx22a022] postponed or cancelled during the COVID-19 period?

Answer type: Radio buttons

Categories:

1. 1 time
2. 2 times
3. 3 times or more

---

Page 17

**if (count(vx22a026 - vx22a032) > 1)**

**vx22a056 – vx22a057**

You indicated that an appointment with a [vx22a022] was postponed or cancelled.

When did this happen, approximately?

*If you do not know, you can provide an estimate. If it happened several times, base your answer on the appointment for which the postponement/cancellation was the most inconvenient for you.*

Question type: Mixed table

Sub-questions:

**vx22a056**

---

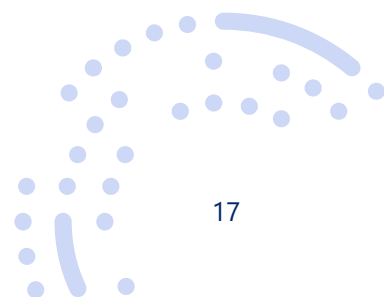



Answer type: Dropdown

Label-left: Month:

Categories:

1. January
2. February
3. March
4. April
5. May
6. June
7. July
8. August
9. September
10. October
11. November
12. December

**vx22a057**

Answer type: Dropdown

Label-left: Year

Categories:

2020. 2020
2021. 2021
2022. 2022

---

Page 18

**if (count(vx22a026 - vx22a032) > 1)**

**vx22a058**

You indicated that an appointment with a [vx22a022] was postponed or cancelled.

Did the postponement of that appointment have consequences for your health?

*E.g. complaints, increased complaints, stress.*

Answer type: Radio buttons

Categories:

1. Yes, a lot
2. Yes, a bit
3. No

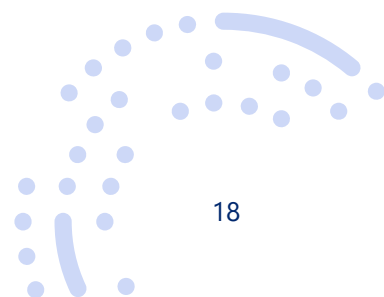



---

Page 19

**if (vx22a058 < 3)**

**vx22a059**

You indicated that an appointment with a [vx22a022] was postponed or cancelled.

What grade would you give your health at the time when you experienced the greatest number of negative consequences of the postponement of the appointment?

Answer type: Radio buttons

Layout: horizontal

Categories:

1. 1 Very poor
2. 2
3. 3
4. 4
5. 5
6. 6
7. 7
8. 8
9. 9
10. 10 Perfect

---

Page 20

**if (vx22a058 < 3)**

**vx22a060**

You indicated that an appointment with a [vx22a022] was postponed or cancelled.

Are you still experiencing negative consequences as a result of the postponement of that appointment?

*E.g. complaints, increased complaints, stress.*

Answer type: Radio buttons

Categories:

1. Yes, a lot
2. Yes, a bit
3. No

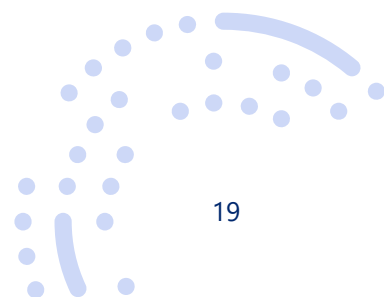



---

Page 21

**if (count(vx22a026 - vx22a032) > 1)**

**vx22a061**

You indicated that an appointment with a [vx22a022] was postponed or cancelled.

What happened with regard to the appointment?

*Answer type:* Radio buttons

*Categories:*

1. It took place at a later date, as originally intended
2. The appointment took place at a later date, but with a different care provider or organization
3. The appointment took place in a different form, e.g. by telephone or video call
4. A new appointment was scheduled, but that appointment has not yet taken place
5. No new appointment has been made (yet)
6. Because my health was deteriorating, I had to make use of emergency care
7. The appointment is no longer necessary

---

Page 22

**all respondents**

**{intro\_zelf}**

The following questions are about postponed care or care that **you personally postponed**. For example because **you** did not make an appointment or because **you** personally cancelled or postponed the appointment.

*Answer type:* None

---

Page 23

**all respondents**

**vx22a062**

These questions still concern "the COVID-19 period", i.e. the period from the start of the COVID-19 crisis in March 2020 up to now.

At any point, did **you** personally choose not to make an appointment because of the COVID-19 pandemic, even though you actually needed healthcare? Or did **you personally** postpone an appointment during the COVID-19 pandemic?

Scheduled appointments with, for example, your dentist or dental hygienist also count for the purposes of this question.

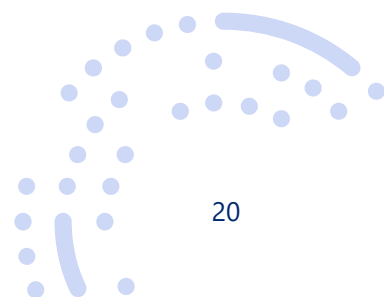



*This question does not concern healthcare needed due to the COVID-19 virus itself, but healthcare for other health problems.*

Answer type: Radio buttons

Categories:

1. Yes
2. No
3. Not applicable, I did not need any care

---

Page 24

**if (vx22a062 = 1)**

**vx22a063 - vx22a069**

Which care provider did you postpone an appointment with or which care provider did you choose not to make an appointment with even though you actually needed to?

*Multiple answers possible.*

Answer type: Checkboxes

Categories:

**vx22a063** my GP or my GP's practice nurse

**vx22a064** my dentist or dental hygienist

**vx22a065** my physiotherapist, dietician or remedial therapist

**vx22a066** a hospital specialist

**vx22a067** a domiciliary carer

**vx22a068** my psychologist or psychiatrist

**vx22a069** a different healthcare provider, namely:

0. No

1. Yes

**vx22a070**

Question type: Inline text field attached to code 1 of question "vx22a069"

Answer type: String

---

Page 25

**if (vx22a015 = 1)**

**vx22a071 - vx22a076**

You indicated that you postponed or cancelled an appointment or treatment with **a hospital specialist**.

What kind of appointment was it?

*Multiple answers possible.*

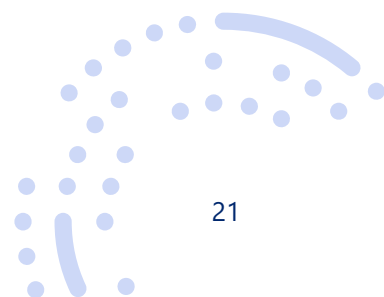



Answer type: Checkboxes

Categories:

**vx22a071** Surgery

**vx22a072** Day treatment

**vx22a073** Diagnosis

**vx22a074** Checkup at outpatient clinic

**vx22a075** Other appointment at outpatient clinic

**vx22a076** I don't know

0. No

1. Yes

---

Page 26

**if (vx22a019 = 0)**

**vx22a077**

You indicated that you postponed or cancelled an appointment or treatment with a **[vx22a023]**.

Was this an appointment relating to a chronic disease?

*A chronic disease is a condition that will never completely go away, such as arthritis, asthma, COPD, diabetes and cardiovascular disease.*

Answer type: Radio buttons

Categories:

1. Yes

2. No

---

Page 27

**if (vx22a062 = 1)**

**vx22a078 - vx22a087**

You indicated that you postponed or cancelled an appointment or treatment with a **[vx22a023]**.

For what reason or reasons did you cancel or postpone your appointment or not contact the **[vx22a023]** at all?

*Multiple answers possible.*

Answer type: Checkboxes

Categories:

**vx22a078** I was afraid of being infected

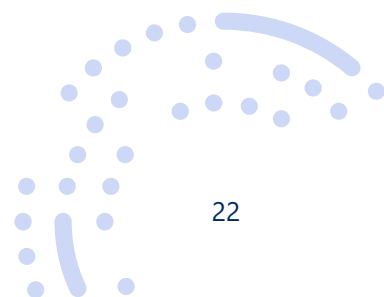



**vx22a079** I was afraid of infecting others with COVID-19

**vx22a080** I did not want to increase the burden on the healthcare provider

**vx22a081** I was afraid that the healthcare provider would not have time

**vx22a082** Because of the COVID-19 crisis, I did not have enough money to pay for healthcare

**vx22a083** Because of the measures against COVID-19, making an appointment was too complicated

**vx22a084** I did not know whether appointments with the healthcare provider were allowed again

**vx22a085** I felt that my issue was not urgent enough

**vx22a086** The healthcare provider was difficult to reach

**vx22a087** Other reason, namely:

0. No

1. Yes

**vx22a088**

*Question type:* Inline text field attached to code 1 of question "vx22a087"

*Answer type:* String

---

Page 28

**if (vx22a062 = 1)**

**vx22a089**

You indicated that you postponed or cancelled an appointment or treatment with a [vx22a023].

How often did you postpone or cancel appointments during the COVID-19 period?

*Answer type:* Radio buttons

*Categories:*

1. 1 time

2. 2 times

3. 3 times or more

---

Page 29

**if (vx22a062 = 1)**

**vx22a090 – vx22a091**

You indicated that you postponed or cancelled an appointment or treatment with a [vx22a023].

When did this happen, approximately?

*If you do not know, you can provide an estimate. If it happened several times, base your answer on the appointment for which the postponement/cancellation was the most inconvenient for you.*

*Question type:* Mixed table

*Sub-questions:*

**vx22a090**

---

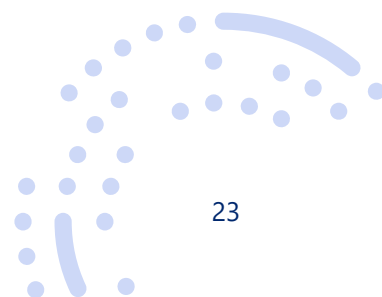



Answer type: Dropdown

Label-left: Month:

Categories:

1. January
2. February
3. March
4. April
5. May
6. June
7. July
8. August
9. September
10. October
11. November
12. December

**vx22a091**

Answer type: Dropdown

Label-left: Year:

Categories:

2020. 2020
2021. 2021
2022. 2022

---

Page 30

**if (vx22a062 = 1)**

**vx22a092**

You indicated that you postponed or cancelled an appointment or treatment with a [vx22a023].

Did the postponement of that appointment have consequences for your health?

*E.g. complaints, increased complaints, stress.*

Answer type: Radio buttons

Categories:

1. Yes, a lot
2. Yes, a bit
3. No

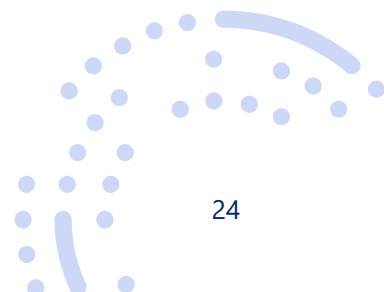



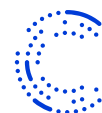

---

Page 31

**if (vx22a092 < 3)**

**vx22a093**

You indicated that you postponed or cancelled an appointment or treatment with a [vx22a023].

What grade would you give your health at the time when you experienced the greatest number of negative consequences of the postponement of the appointment?

Answer type: Radio buttons

Layout: horizontal

Categories:

1. 1 Very poor
2. 2
3. 3
4. 4
5. 5
6. 6
7. 7
8. 8
9. 9
10. 10 Perfect

---

Page 32

**if (vx22a092 < 3)**

**vx22a094**

You indicated that you postponed or cancelled an appointment or treatment with a [vx22a023].

Are you still experiencing any negative consequences because of the postponement of this healthcare?

*E.g. complaints, increased complaints, stress.*

Answer type: Radio buttons

Categories:

1. Yes, a lot
2. Yes, a bit
3. No

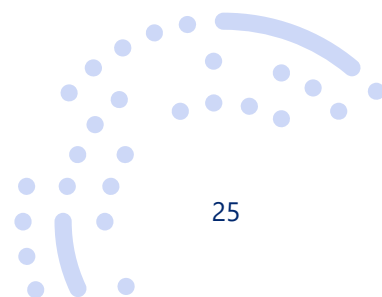



---

Page 33

**if (vx22a062 = 1)**

**vx22a095**

You indicated that you postponed or cancelled an appointment or treatment with a **[vx22a023]**.

Have you received that healthcare since then?

*Answer type:* Radio buttons

*Categories:*

1. Yes, fully
2. Yes, partially
3. No, and I am still in need of care
4. No, but I no longer need care (for example because the complaint went away by itself)

---

Page 34

**if (vx22a016 = 1)**

**vx22a096 - vx22a101**

You indicated that you postponed or cancelled an appointment or treatment with **a hospital specialist**.

What kind of appointment was it?

*Multiple answers possible.*

*Answer type:* Checkboxes

*Categories:*

- vx22a096** Surgery
  - vx22a097** Day treatment
  - vx22a098** Diagnosis
  - vx22a099** Checkup at outpatient clinic
  - vx22a100** Other appointment at outpatient clinic
  - vx22a101** I don't know
0. No
1. Yes

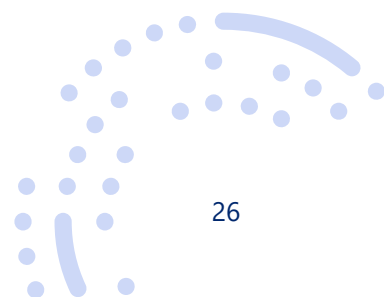



---

Page 35

**if (vx22a020 = 0)**

**vx22a102**

You indicated that you postponed or cancelled an appointment or treatment with a [vx22a024].

Was this an appointment relating to a chronic disease?

*A chronic disease is a condition that will never completely go away, such as arthritis, asthma, COPD, diabetes and cardiovascular disease.*

Answer type: Radio buttons

Categories:

1. Yes
2. No

---

Page 36

**if (count(vx22a063 - vx22a069) > 1)**

**vx22a103 - vx22a112**

You indicated that you postponed or cancelled an appointment or treatment with a [vx22a024].

For what reason or reasons did you cancel or postpone your appointment or not contact the [vx22a024] at all?

*Multiple answers possible.*

Answer type: Checkboxes

Categories:

- vx22a103** I was afraid of being infected
- vx22a104** I was afraid of infecting others with COVID-19
- vx22a105** I did not want to increase the burden on the healthcare provider
- vx22a106** I was afraid that the healthcare provider would not have time
- vx22a107** Because of the COVID-19 crisis, I did not have enough money to pay for healthcare
- vx22a108** Because of the measures against COVID-19, making an appointment was too complicated
- vx22a109** I did not know whether appointments with the healthcare provider were allowed again
- vx22a110** I felt that my issue was not urgent enough
- vx22a111** The healthcare provider was difficult to reach
- vx22a112** Other reason, namely:
0. No
1. Yes

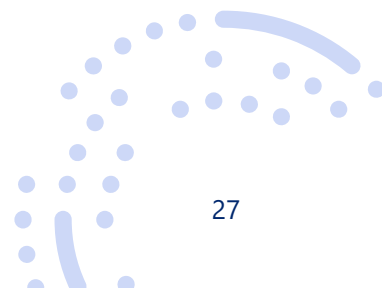



### **vx22a113**

Question type: Inline text field attached to code 1 of question "vx22a112"

Answer type: String

---

Page 37

**if (count(vx22a063 - vx22a069) > 1)**

### **vx22a114**

You indicated that you postponed or cancelled an appointment or treatment with a [vx22a024].

How often did you postpone or cancel appointments during the COVID-19 period?

Answer type: Radio buttons

Categories:

1. 1 time
2. 2 times
3. 3 times or more

---

Page 38

**if (count(vx22a063 - vx22a069) > 1)**

### **vx22a115 – vx22a116**

You indicated that you postponed or cancelled an appointment or treatment with a [vx22a024].

When did this happen, approximately?

*If you do not know, you can provide an estimate. If it happened several times, base your answer on the appointment for which the postponement/cancellation was the most inconvenient for you.*

Question type: Mixed table

Sub-questions:

### **vx22a115**

Answer type: Dropdown

Label-left: Month:

Categories:

1. January
2. February
3. March
4. April
5. May
6. June
7. July
8. August
9. September

---

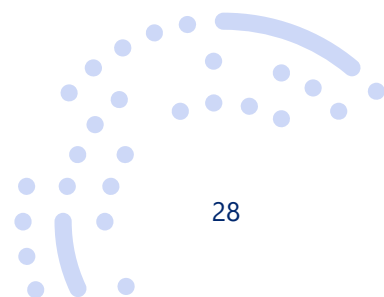



- 10. October
- 11. November
- 12. December

**vx22a116**

Answer type: Dropdown

Label-left: Year:

Categories:

- 2020. 2020
- 2021. 2021
- 2022. 2022

---

Page 39

**if (count(vx22a063 - vx22a069) > 1)**

**vx22a117**

You indicated that you postponed or cancelled an appointment or treatment with a [vx22a024].

Did the postponement of that appointment have consequences for your health?

*E.g. complaints, increased complaints, stress.*

Answer type: Radio buttons

Categories:

- 1. Yes, a lot
- 2. Yes, a bit
- 3. No

---

Page 40

**if (vx22a117 < 3)**

**vx22a118**

You indicated that you postponed or cancelled an appointment or treatment with a [vx22a024].

What grade would you give your health at the time when you experienced the greatest number of negative consequences of the postponement/cancellation of the appointment?

Answer type: Radio buttons

Layout: horizontal

Categories:

- 1. 1 Very poor
- 2. 2
- 3. 3
- 4. 4

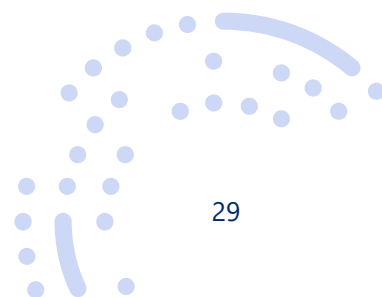



5. 5
6. 6
7. 7
8. 8
9. 9
10. 10 Perfect

---

Page 41

**if (vx22a117 < 3)**

**vx22a119**

You indicated that you postponed or cancelled an appointment or treatment with a [vx22a024].

Are you still experiencing any negative consequences because of the postponement of this healthcare?  
*E.g. complaints, increased complaints, stress.*

*Answer type:* Radio buttons

*Categories:*

1. Yes, a lot
2. Yes, a bit
3. No

---

Page 42

**if (count(vx22a063 - vx22a069) > 1)**

**vx22a120**

You indicated that you postponed or cancelled an appointment or treatment with a [vx22a024].

Have you since received that healthcare?

*Answer type:* Radio buttons

*Categories:*

1. Yes, fully
2. Yes, partially
3. No, and I am still in need of the care in question
4. No, but I no longer need the care in question (for example because the complaint went away by itself)

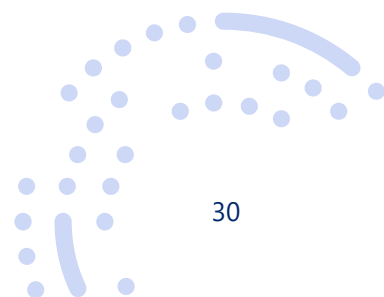



---

Page 43

**all respondents**

**vx22a121**

What grade would you give your health right now?

*Answer type:* Radio buttons

*Layout:* horizontal

*Categories:*

1. 1 Very poor
2. 2
3. 3
4. 4
5. 5
6. 6
7. 7
8. 8
9. 9
10. 10 Perfect

---

Page 44

**all respondents**

**vx22a122**

Compared to the period immediately before the start of the COVID-19 pandemic, my health right now is...

*Answer type:* Radio buttons

*Categories:*

1. A lot worse
2. Worse
3. The same
4. Better
5. A lot better

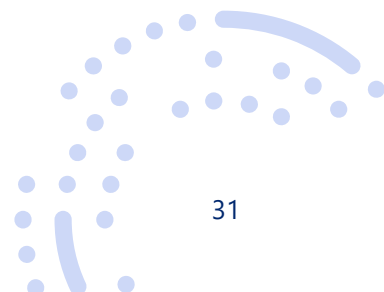



**all respondents**

**vx22a123 - vx22a127**

We will now present a few statements about how you experienced your health during the COVID-19 pandemic. When we talk about postponed healthcare, we mean healthcare postponed by the healthcare provider as well as healthcare postponed by you personally.

*Question type:* Table

*Answer type:* Radio buttons

*Sub-questions:*

**vx22a123** Due to postponed healthcare during the COVID-19 pandemic, my health temporarily got worse.

**vx22a124** Due to postponed healthcare during the COVID-19 pandemic, my health got permanently worse.

**vx22a125** Generally speaking, I am satisfied with the healthcare I received during the COVID-19 pandemic.

**vx22a126** Due to postponed healthcare during the COVID-19 pandemic, I was concerned about my health.

**vx22a127** Due to postponed healthcare, I used more medication.

*Categories:*

1. Completely disagree
2. Disagree
3. Neutral
4. Agree
5. Completely agree
99. N/A

**all respondents**

**{outro}**

This is the end of the questionnaire. Thank you for your participation. The results of this questionnaire will probably be presented on the website for LISS panel members and the [RIVM web page on the health consequences of postponed care during the COVID-19 pandemic](#) towards the end of this year.

You will now be asked a final few question about how you experienced this questionnaire.

*Answer type:* None

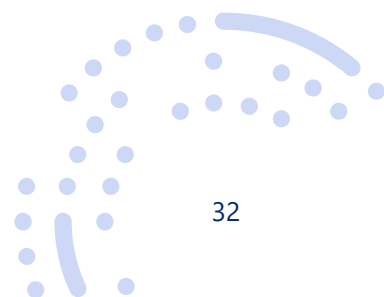





### **all respondents**

#### **vx22a128 – vx22a132**

Note: Please complete the questionnaire until you are returned to the starting screen. Only then will the system register the questionnaire as **fully** completed.

Finally; what did you think of this questionnaire?

*Question type:* Table

*Answer type:* Radio buttons

*Sub-questions:*

**vx22a128** Was it difficult to answer the questions?

**vx22a129** Were the questions sufficiently clear?

**vx22a130** Did the questionnaire get you thinking about things?

**vx22a131** Was it an interesting subject?

**vx22a132** Did you enjoy answering the questions?

*Categories:*

1. 1 Certainly not
2. 2
3. 3
4. 4
5. 5 Certainly yes

---

#### **vx22a133**

Starting date questionnaire  
*string*

#### **vx22a134**

Starting time questionnaire  
*string*

#### **vx22a135**

End date questionnaire  
*string*

#### **vx22a136**

End time questionnaire  
*string*

*calculated variable*

#### **vx22a137**

Duration in seconds  
*integer*

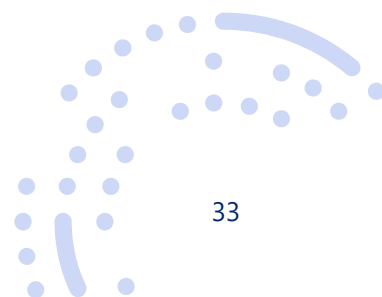

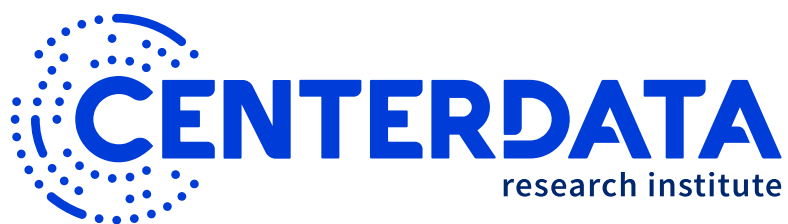

**Centerdata**  
Postbus 90153  
5000 LE Tilburg

[www.centerdata.nl](http://www.centerdata.nl)
